# Supplementary material for: Pyrolysis of Energy Cane Bagasse: Investigating Kinetics, Thermodynamics, and Effect of Temperature on Volatile Products
Source: MDPI journal article supplement (doi:10.3390/en16155669), 2023-07-28
Supplement: s1 [file s1]

# Pyrolysis of Energy Cane Bagasse: Investigating Kinetics, Thermodynamics, and Effect of Temperature on Volatile Products

Denisson O. Liborio <sup>1</sup>, Juan F. Gonzalez <sup>1</sup>, Santiago Arias <sup>1</sup>, Guilherme D. Mumbach <sup>2</sup>, Jose Luiz F. Alves <sup>2</sup>, Jean C. G. da Silva <sup>3</sup>, Jose Marcos F. Silva <sup>1</sup>, Celmy M. B. M. Barbosa <sup>1</sup>, Florival R. Carvalho <sup>4</sup>, Ricardo R. Soares <sup>5</sup>, Diogo A. Simões <sup>4</sup> and José Geraldo A. Pacheco <sup>1,\*</sup>

<sup>1</sup> Laboratory of Refining and Cleaner Technology-LabRefino-Lateclim, Department of Chemical Engineering, Institute for Petroleum and Energy Research-LITPEG, Federal University of Pernambuco, Av dos Arquitetos, Recife 50740-521, PE, Brazil; denisson.liborio@ufpe.br (D.O.L.); juan.felipe.gonzalez.alba@gmail.com (J.F.G.); ariashenao@gmail.com (S.A.); jose.mfsilva@ufpe.br (J.M.F.S.); celmy@ufpe.br (C.M.B.M.B.)

<sup>2</sup> Department of Chemical Engineering and Food Engineering, Federal University of Santa Catarina, Florianópolis 88040-900, SC, Brazil; guilherme.mumbach@posgrad.ufsc.br (G.D.M.); jose.alves@posgrad.ufsc.br (J.L.F.A.)

<sup>3</sup> School of Agricultural Engineering, University of Campinas (GBMA/FEAGRI/UNICAMP), Campinas 13083-875, SP, Brazil; jean.constantino@cear.ufpb.br

<sup>4</sup> Fuel Laboratory, LITPEG, Federal University of Pernambuco, Recife 50670-901, PE, Brazil; florival@ufpe.br (F.R.C.); diogo.simoess@ufpe.br (D.A.S.)

<sup>5</sup> Faculty of Chemical Engineering, Federal University of Uberlândia, Uberlândia 38408-144, MG, Brazil; rrsouares@ufu.br

\* Correspondence: jose.pacheco@ufpe.br; Tel.: +55-81-99998-6588

## Supplementary Material

### *Multicomponent kinetic modeling*

For comparison purposes, results of three other classical integral methods, namely the Flynn–Wall–Ozawa (FWO), Kissinger–Akahira–Sunose (KAS), and Starink (STK) have been present in the supplementary material. In contrast to Fridman (FR) method, the integral isoconversional methods, expressed by Equation (S1) to Equation (S3), use numerical approximations to solve  $[p(x)]$ . The FWO method applies Doyle's approximation [50], the KAS method uses Murray and White's approximation [50], and the STK method uses Starink's approximation [51]. Four isoconversional methods were used to evaluate the coherence of activation energy values employing two distinct calculation algorithms, namely differential and integral methods [31,52].

$$\text{FWO: } \log \beta = \log \left( \frac{AE_a}{Rg(\alpha)} \right) - 2.315 - 0.4567 \frac{E_a}{RT} \quad (\text{S1})$$

$$\text{KAS: } \ln \left( \frac{\beta}{T^2} \right) = \ln \left( \frac{AR}{E_a g(\alpha)} \right) - \frac{E_a}{RT} \quad (\text{S2})$$

$$\text{STK: } \ln \left( \frac{\beta}{T^{1.92}} \right) = \text{Constant} - 1.0008 \frac{E_a}{RT} \quad (\text{S3})$$

The activation energy ( $E_a$ ) was determined for a constant conversion degree by plotting  $\log(\beta)$  vs.  $(1/T)$  for the FWO method,  $\ln(\beta/T^2)$  vs.  $(1/T)$  for the KAS

method and  $\ln(\beta/T^{1.92})$  vs.  $(1/T)$  for the STK method, as indicated by linearized versions of Equation (S1) to Equation (S3).

### Results for activation energy

Figure S1 illustrates the dependence of the activation energy on the extent of conversion for each of the pseudo-components by the FR, FWO, KAS and STK methods. The activation energy dependence on the extent of conversion for the three integral methods shows a similar trend with considerable overlap. However, the activation energy values for the FR differential method varied with the degree of conversion, similar to the integral isoconversional methods, but with a clear overestimation.

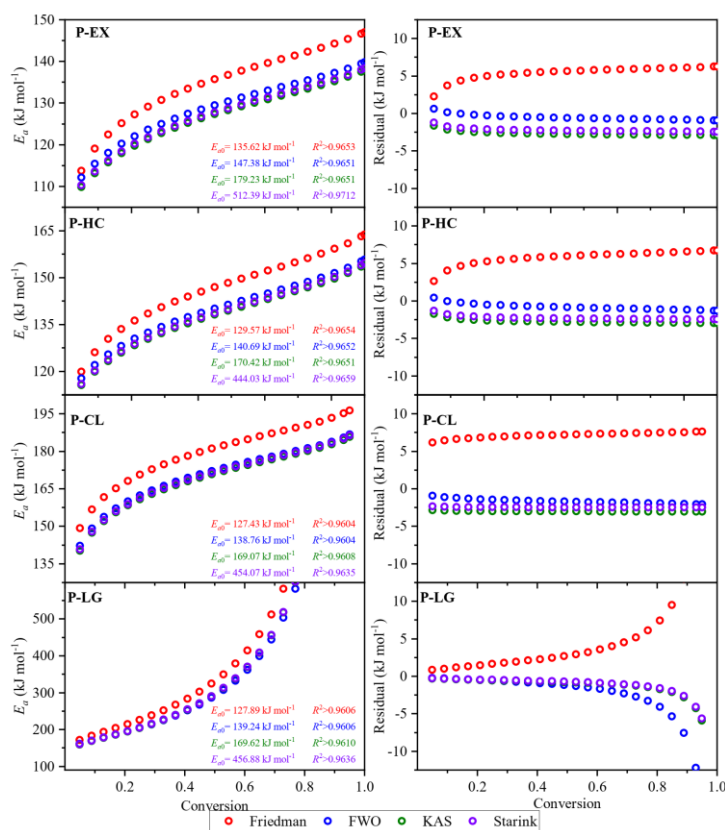

**Figure S1.** Dependence of the activation energy and residual plots on the extent of conversion for the pyrolysis of energy cane bagasse with four independent parallel reactions for the four isoconversional methods FR, FWO, KAS and STK.

As displayed in Table S1, the activation energy results obtained from FWO, KAS, and STK isoconversional methods exhibited slight deviations attributed to the use of different temperature integral approximations. Also, the FR isoconversional method, which is free of mathematical approximations and utilizes numerical differentiation of nonisothermal thermogravimetry data, is highly sensitive to experimental noise, representing a major drawback of the method [59,62]. The literature indicates that this phenomenon affects activation energy calculations, resulting in the FR isoconversional method typically yielding higher activation energy values than classical integral methods [60,61].

**Table S1.** Main compounds from TIC chromatogram of the fast pyrolysis of energy cane bagasse.

| Isoconversional<br>method | <b>P-EX</b>                   |       | <b>P-HL</b>                   |       | <b>P-CL</b>                   |       | <b>P-LG</b>                   |       |
|---------------------------|-------------------------------|-------|-------------------------------|-------|-------------------------------|-------|-------------------------------|-------|
|                           | $E_a$ (kJ mol <sup>-1</sup> ) | $R^2$ |
| FR                        | 135.62                        | 0.97  | 147.38                        | 0.97  | 179.23                        | 0.97  | 512.39                        | 0.97  |
| FWO                       | 129.57                        | 0.97  | 140.69                        | 0.97  | 170.42                        | 0.97  | 444.03                        | 0.97  |
| KAS                       | 127.43                        | 0.96  | 138.76                        | 0.96  | 169.07                        | 0.96  | 456.07                        | 0.96  |
| STK                       | 127.89                        | 0.96  | 139.24                        | 0.96  | 169.62                        | 0.96  | 456.88                        | 0.96  |

Abbreviations: P-EX, pseudo-extractives; P-HC, pseudo-hemicellulose; P-CL, pseudo-cellulose; and P-LG, pseudo-lignin.

**Table S2.** Thermodynamic parameters with respect to progressing conversions and their respective average values for the pyrolysis of energy cane bagasse with four independent parallel reactions. Units:  $\Delta H$  and  $\Delta G$  (kJ mol<sup>-1</sup>);  $\Delta S$  (J mol<sup>-1</sup> K<sup>-1</sup>).

| $\alpha$  | P-EX       |            |            | P-HC       |            |            | P-CL       |            |            | P-LG       |            |            |
|-----------|------------|------------|------------|------------|------------|------------|------------|------------|------------|------------|------------|------------|
|           | $\Delta H$ | $\Delta G$ | $\Delta S$ | $\Delta H$ | $\Delta G$ | $\Delta S$ | $\Delta H$ | $\Delta G$ | $\Delta S$ | $\Delta H$ | $\Delta G$ | $\Delta S$ |
| 0.1       | 131.45     | 154.33     | -45.57     | 143.09     | 161.55     | -35.78     | 171.70     | 180.45     | -15.17     | 507.49     | 207.60     | 508.60     |
| 0.2       | 131.33     | 154.99     | -45.80     | 142.94     | 162.18     | -36.05     | 171.56     | 180.71     | -15.41     | 507.32     | 197.35     | 508.32     |
| 0.3       | 131.26     | 155.39     | -45.94     | 142.85     | 162.57     | -36.22     | 171.47     | 180.87     | -15.56     | 507.18     | 188.59     | 508.09     |
| 0.4       | 131.20     | 155.69     | -46.04     | 142.79     | 162.86     | -36.34     | 171.41     | 180.99     | -15.66     | 507.03     | 179.94     | 507.87     |
| 0.5       | 131.16     | 155.93     | -46.13     | 142.73     | 163.10     | -36.44     | 171.36     | 181.08     | -15.74     | 506.89     | 170.97     | 507.64     |
| 0.6       | 131.12     | 156.14     | -46.20     | 142.68     | 163.32     | -36.53     | 171.31     | 181.17     | -15.81     | 506.73     | 161.57     | 507.41     |
| 0.7       | 131.09     | 156.34     | -46.26     | 142.63     | 163.55     | -36.62     | 171.27     | 181.24     | -15.88     | 506.56     | 151.28     | 507.17     |
| 0.8       | 131.05     | 156.55     | -46.33     | 142.58     | 163.79     | -36.71     | 171.23     | 181.32     | -15.94     | 506.38     | 140.21     | 506.91     |
| 0.9       | 131.00     | 156.81     | -46.42     | 142.50     | 164.12     | -36.84     | 171.18     | 181.41     | -16.02     | 506.18     | 128.05     | 506.64     |
| <b>Av</b> | 131.18     | 155.80     | -46.08     | 142.76     | 163.00     | -36.39     | 171.39     | 181.03     | -15.69     | 506.86     | 169.51     | 507.63     |
| <b>SD</b> | 0.14       | 0.79       | 0.27       | 0.19       | 0.81       | 0.34       | 0.17       | 0.31       | 0.27       | 0.44       | 26.63      | 0.66       |

Abbreviations: P-EX: pseudo-extractives; P-HC: pseudo-hemicellulose; P-CL: pseudo-cellulose; and P-LG: pseudo-lignin. Av: Average values; SD: Standard Deviation.

## References

31. Mumbach G. D., Alves J. L. F., da Silva J. C. G., Di Domenico M., Arias S., Pacheco J. G. A., Marangoni C., Machado R. A. F., Bolzan A. Prospecting pecan nutshell pyrolysis as a source of bioenergy and bio-based chemicals using multicomponent kinetic modeling, thermodynamic parameters estimation, and Py-GC/MS analysis. *Renew. Sust. Energ. Rev.*, 2022, 153, 111753. Doi: <https://doi.org/10.1016/j.rser.2021.111753>.
50. Vyazovkin, S., Burnham, A. K., Criado, J. M., Pérez-Maqueda, L. A., Popescu, C., Sbirrazzuoli, N. ICTAC Kinetics Committee recommendations for performing kinetic computations on thermal analysis data. *Thermochim acta*, 2011, 520 Issues 1-2, 1-19. Doi: <https://doi.org/10.1016/j.tca.2011.03.034>.
51. Starink MJ. The determination of activation energy from linear heating rate experiments: A comparison of the accuracy of isoconversion methods. *Thermochim Acta* 2003;404:163–76. [https://doi.org/10.1016/S0040-6031\(03\)00144-8](https://doi.org/10.1016/S0040-6031(03)00144-8).
52. Ahmad MS, Liu C-G, Nawaz M, Tawab A, Shen X, Shen B, et al. Elucidating the pyrolysis reaction mechanism of Calotropis procera and analysis of pyrolysis products to evaluate its potential for bioenergy and chemicals. *Bioresour Technol* 2021;322:124545. <https://doi.org/10.1016/j.biortech.2020.124545>.
59. Ma Z, Chen D, Gu J, Bao B, Zhang Q. Determination of pyrolysis characteristics and kinetics of palm kernel shell using TGA-FTIR and model-free integral methods. *Energy Convers Manag* 2015;89:251–9. <https://doi.org/10.1016/j.enconman.2014.09.074>.
60. Moine E cheikh, Groune K, El Hamidi A, Khachani M, Halim M, Arsalane S. Multistep process kinetics of the non-isothermal pyrolysis of Moroccan Rif oil shale. *Energy* 2016;115:931–41. <https://doi.org/10.1016/j.energy.2016.09.033>.
61. Mishra G, Kumar J, Bhaskar T. Kinetic studies on the pyrolysis of pinewood. *Bioresour Technol* 2015;182:282–8. <https://doi.org/10.1016/j.biortech.2015.01.087>.
62. Yao Z, Cai D, Chen X, Sun Y, Jin M, Qi W, et al. Thermal behavior and kinetic study on the co-pyrolysis of biomass with polymer waste. *Biomass Convers Biorefinery* 2022. <https://doi.org/10.1007/s13399-022-02480-7>.
